# Supplementary material
Source: Springer Nature journal article supplement (https://www.springermedizin.de/resource/supplementary/13023_2013_684_MOESM1_ESM.pdf/9642678)
Supplement: MOESM1 [file 9642678]

**Eligibility**

Assessed for eligibility (n=25 )

Excluded (n=18)

- Not meeting inclusion criteria (n=8)
- Declined to participate (n=10)

**Enrollment**

Enrolled (n=7)

**Allocation**

Allocated to intervention (n=7)

- Received allocated intervention (n=7)

**Analysis**

Analysed (n=7 )
